# Supplementary material
Source: Springer Nature journal article supplement (https://www.springermedizin.de/resource/supplementary/12913_2006_583_MOESM3_ESM.pdf/9535388)

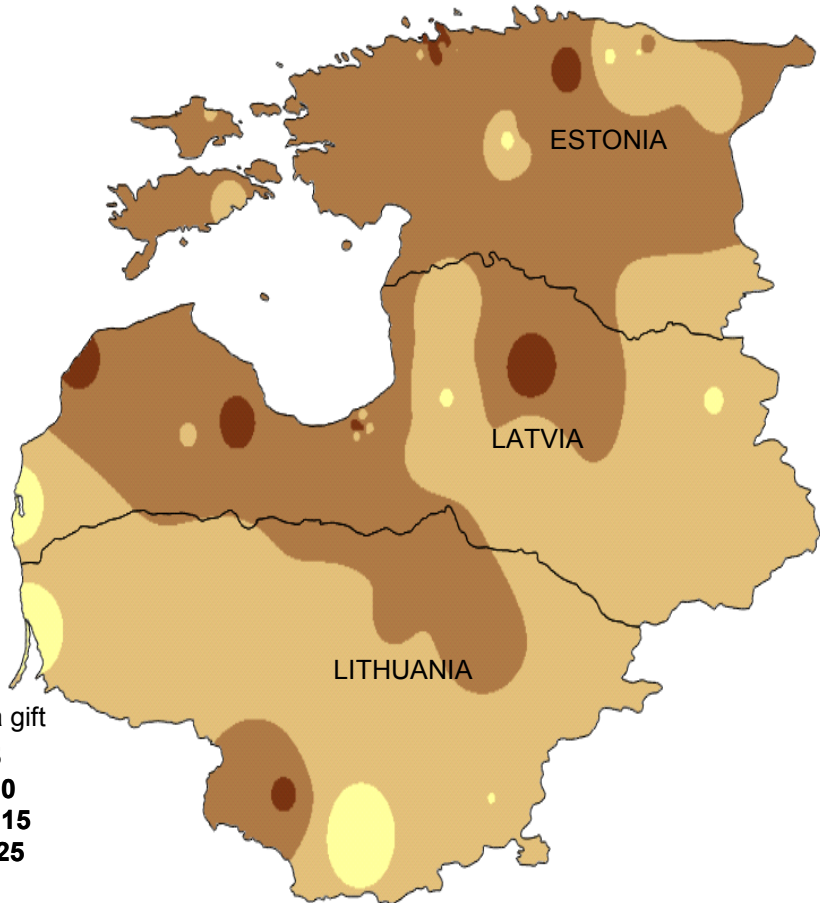

ESTONIA

LATVIA

LITHUANIA

% who gave a gift

- 0 - 5
- 6 - 10
- 11 - 15
- 16 - 25

Supplement: MOESM3 [file 9535388]
